# Supplementary material for: Identification of ADAMTS19 as a novel retinal factor involved in ocular growth regulation
Source: bioRxiv or medRxiv preprint supplement (doi:10.1101/2020.06.03.132852), 2020-06-04
Supplement: Supplementary file [file media-1.pdf]

1

## SUPPLEMENTAL FIGURES

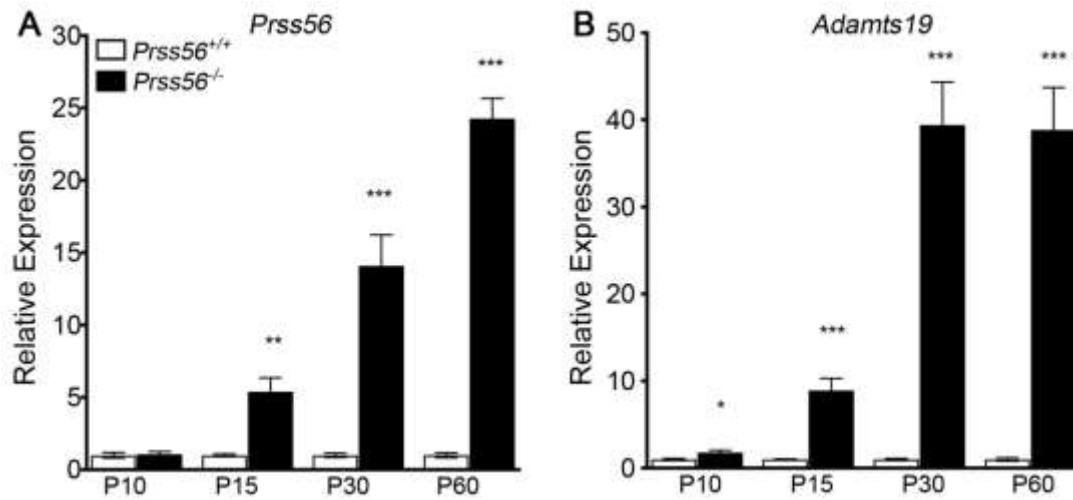

2

3 **Figure S1. *Prss56* and *Adamts19* expression in *Prss56*<sup>-/-</sup> retina across ages. (A-B)**

4 Graphs showing quantification of *Prss56* (A) and *Adamts19* (B) mRNA levels using qPCR

5 in wild-type and mutant retina at different developmental stages. A significant increase in

6 *Adamts19* mRNA levels was detected as early as P10 in *Prss56* mutant retina (B), while

7 upregulation in *Prss56* mRNA was first observed at P15 in the mutant retina (A). The

8 magnitude of the increase of both *Prss56* and *Adamts19* expression became more

9 pronounced with age in the mutant retina. *Prss56* and *Adamts19* expression were

10 normalized to the expression of three housekeeping genes (*Hprt1*, *Actb1*, and *Mapk1*).

11 Data are presented as fold expression relative to wild-type (mean ± SEM), N=4 to 6/group.

12 \*p<0.05; \*\*p<0.01; \*\*\*p<0.001, t-test. The *Prss56* qPCR data in A were previously

13 published in Figure 4 of Paylakhi et al. 2018 [13].

14

15

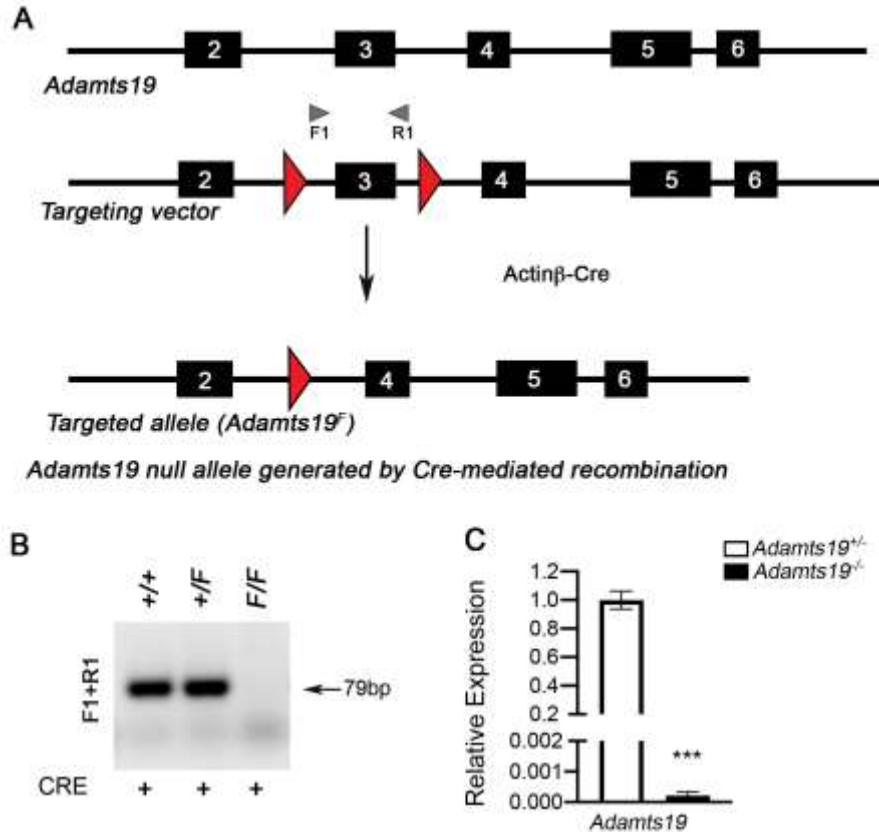

16  
17  
18  
19  
20  
21  
22  
23  
24  
25  
26  
27  
28  
29  
30

**Figure S2. Generation of *Adamts19* mutant mice allele.**

(A) The LoxP site flanks the exon 3 of the *Adamts19<sup>F</sup>* allele. In presence of Cre recombinase, the *Adamts19* exon is deleted resulting in a frameshift mutation and premature stop codon, rendering the *Adamts19* catalytically inactive. (B-C) *Adamts19* exon 3 excisions was confirmed by PCR as well as qPCR. (B) PCR amplification of DNA from wild-type (*Adamts19<sup>+/+</sup>*, lane 1), heterozygous (*Adamts19<sup>F/+</sup>*, lane 2), or homozygous (*Adamts19<sup>F/F</sup>*) mice. PCR reactions were performed using primers amplifying regions of intron 2 and exon 3. The deletion of exon 3 from the *Adamts19<sup>F/F</sup>* allele gives no PCR product. using primers amplifying a region of intron 2 and exon 3 gives no PCR product from DNA from *Adamts19<sup>F/F</sup>* mice. (C) qPCR analysis employing primers amplifying exon 3 of *Adamts19* further confirm that *Adamts19<sup>-/-</sup>;Prss56<sup>-/-</sup>* retina lacks exon 3.

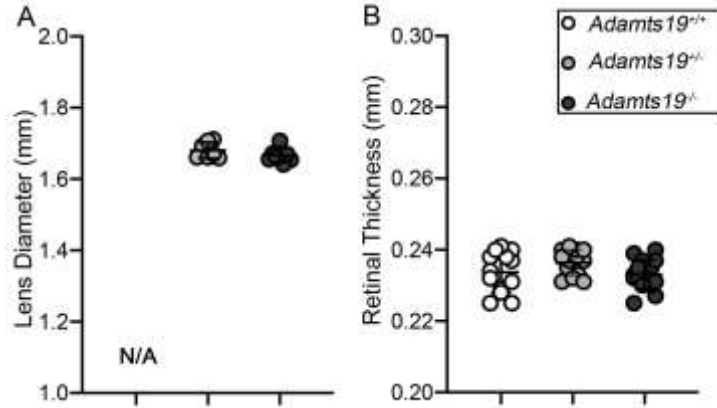

31  
32  
33  
34  
35  
36  
37  
38  
39  
40  
41  
42  
43  
44  
45  
46  
47  
48  
49  
50

**Figure S3. Ocular biometric analysis in *Adamts19* mutant mice**

Histograms showing that ocular the lens diameter (**A**) and retinal thickness (**B**) were indistinguishable in *Adamts19*<sup>-/-</sup>;*Prss56*<sup>-/-</sup>, *Adamts19*<sup>+/-</sup>;*Prss56*<sup>-/-</sup> and control *Adamts19*<sup>+/-</sup>;*Prss56*<sup>+/-</sup> mice. Data are presented as mean ± SD, N<sub>≥</sub>7/group. \*p<0.05, One-way ANOVA.

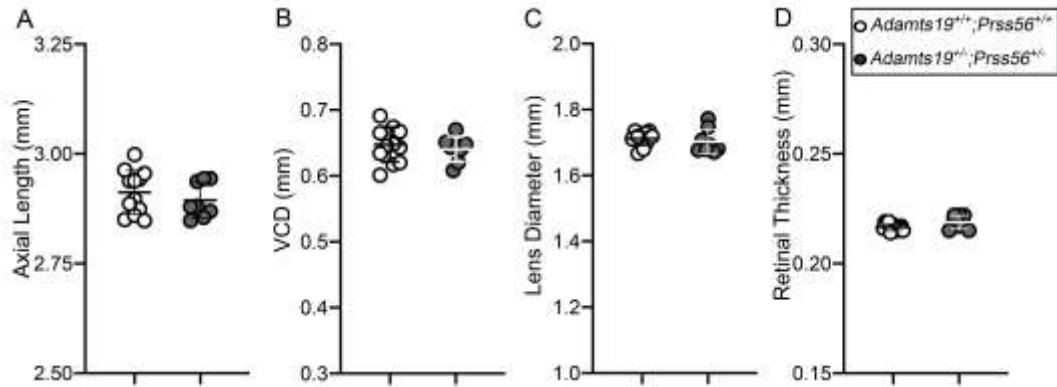

51  
 52 **Figure S4. Ocular biometric parameters are indistinguishable between wild-type**  
 53 **and *Adamts19*<sup>+/-</sup>;*Prss56*<sup>+/-</sup> mice. (A-D) Histograms showing that all the ocular biometric**  
 54 **parameters examined including axial length (A), vitreous (VCD) (B), lens diameters (C)**  
 55 **and retinal thickness (D) are indistinguishable between wild-type (*Adamts19*<sup>+/-</sup>;*Prss56*<sup>+/-</sup>)**  
 56 **and *Adamts19*<sup>+/-</sup>;*Prss56*<sup>+/-</sup> mice at P18 Data are presented as mean ± SD, N<sub>≥</sub>7/group.**  
 57 \*p<0.05, One-way ANOVA.

58  
 59  
 60  
 61  
 62  
 63  
 64  
 65  
 66  
 67  
 68

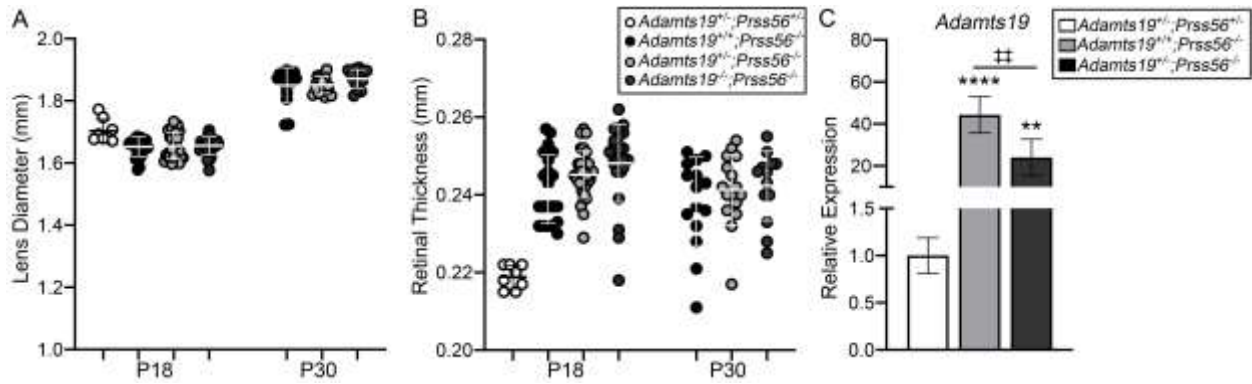

69

70

71 **S5. Ocular biometric analysis of *Adamts19*<sup>-/-</sup>;*Prss56*<sup>-/-</sup> mice. (A-B)** Histograms

72 showing that retinal thickness (A) is modestly increased in *Adamts19*<sup>-/-</sup>;*Prss56*<sup>-/-</sup> mice

73 compared to control (*Adamts19*<sup>+/-</sup>;*Prss56*<sup>+/-</sup>) mice at P18, but not at P30, while the lens

74 diameter (B) is indistinguishable in *Adamts19*<sup>-/-</sup>;*Prss56*<sup>-/-</sup>, *Adamts19*<sup>+/-</sup>;*Prss56*<sup>-/-</sup> and

75 control (*Adamts19*<sup>+/-</sup>;*Prss56*<sup>+/-</sup>) mice at both ages examined. (C) Histogram showing

76 relative *Adamts19* mRNA levels AGE N>4/group. Data are presented as mean ± SD,

77 N<sub>≥</sub>13/group. \*p<0.05, One-way ANOVA.

78

79

80

81

82

83

84

85

86

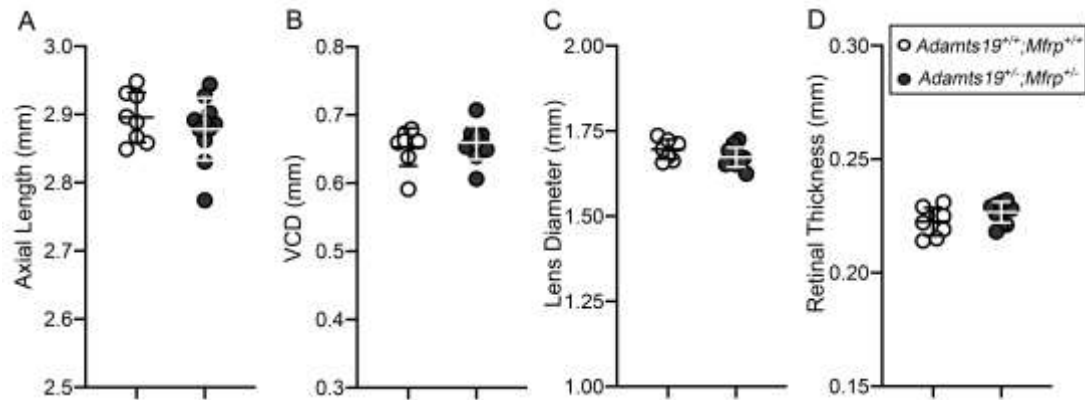

87

88

89 **Figure S6. Ocular biometric parameters are indistinguishable between wild-type**

90 **and *Adamts19<sup>+/-</sup>;*Mfrp<sup>+/-</sup> mice. (A-D)** Histograms showing that all the ocular biometric

91 parameters examined including axial length (A), vitreous (VCD) (B), lens diameters (C),

92 and retinal thickness (D) are indistinguishable between wild-type (*Adamts19<sup>+/+</sup>;*Mfrp<sup>+/+</sup>)

93 and *Adamts19<sup>+/-</sup>;*Mfrp<sup>+/-</sup> mice at P18. Data are presented as mean ± SD, N<sub>≥</sub>7/group.

94 \*p<0.05, One-way ANOVA.

95

96

97

98

99

100

101

102

103

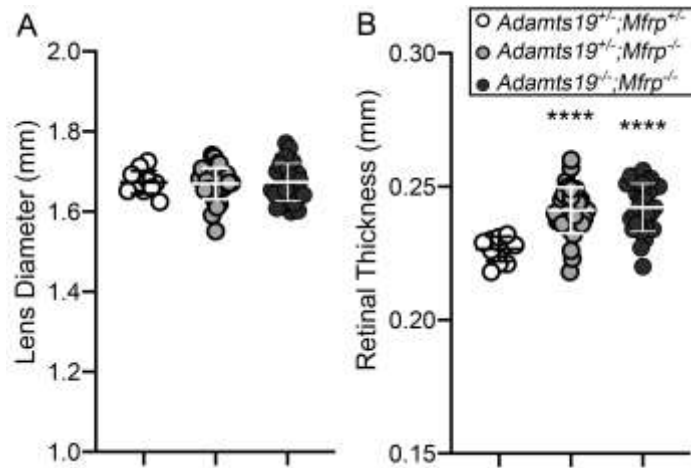

104  
 105  
 106  
 107  
 108  
 109  
 110  
 111  
 112  
 113  
 114  
 115  
 116  
 117

**Figure S7. Ocular biometric analysis of *Adamts19<sup>-/-</sup>;Mfrp<sup>-/-</sup>* mice. (A-C)** Histograms showing that the lens diameter (A) are indistinguishable in *Adamts19<sup>+/-</sup>; Mfrp<sup>-/-</sup>*, *Adamts1<sup>-/-</sup>; Mfrp<sup>-/-</sup>*, and control (*Adamts19<sup>+/-</sup>; Mfrp<sup>+/-</sup>*) mice, while the retinal thickness (B) is increased in both *Adamts19<sup>+/-</sup>; Mfrp<sup>-/-</sup>* and *Adamts1<sup>-/-</sup>;Mfrp<sup>-/-</sup>* mice compared to control *Adamts19<sup>+/-</sup>; Mfrp<sup>+/-</sup>* mice at P18. Data are presented as mean  $\pm$  SD,  $N \geq 11$ /group. \*\*\*\* $p < 0.0001$ , One-way ANOVA.

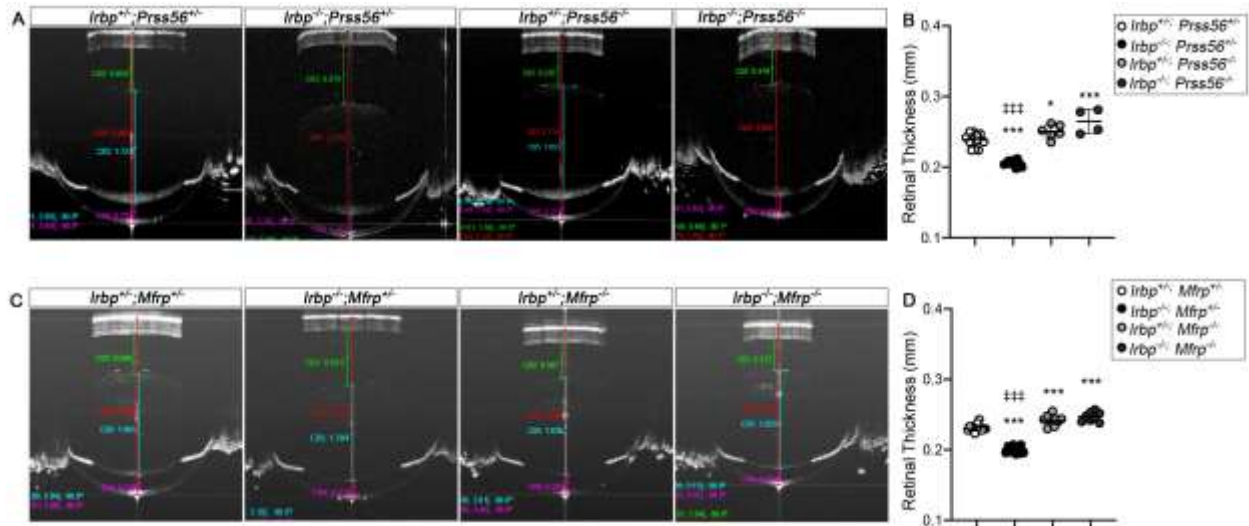

118

119 **Figure S8.**

120 **Ocular biometric analysis of *Irbp* mutant mice following *Prss56* inactivation**

121 **(A)** Representative OCT images showing that ocular axial length (quantified in Fig. 6A)  
 122 and VCD (quantified in Fig. 6 B) are increased in *Irbp* mutant mice (*Irbp*<sup>-/-</sup>; *Prss56*<sup>+/-</sup>) and  
 123 reduced in *Prss56* mutant mice compared to control *Irbp*<sup>+/-</sup>; *Prss56*<sup>+/-</sup> control mice at P18.  
 124 In contrast, retinal thickness **(B)** were reduced in *Irbp* mutant mice (*Irbp*<sup>-/-</sup>; *Prss56*<sup>+/-</sup>) and  
 125 retinal thickness was increased in *Prss56* mutant and *Irbp*; *Prss56* double mutant mice  
 126 (*Irbp*<sup>+/-</sup>; *Prss56*<sup>-/-</sup> and *Irbp*<sup>-/-</sup>; *Prss56*<sup>-/-</sup>, respectively) compared to control *Irbp*<sup>+/-</sup>; *Prss56*<sup>+/-</sup>  
 127 mice. Data are presented as mean ± SD, N<sub>≥</sub>4/group. \*\*p<0.01; \*\*\*p<0.0001 (compared  
 128 to controls); ###p<0.001 (compared to double mutant *Irbp*<sup>-/-</sup>; *Prss56*<sup>-/-</sup> mice), One-way  
 129 Anova.

130 **Biometric analysis of *Irbp* mutant mice following *Mfrp* inactivation **(C)****

131 Representative OCT images showing that ocular axial length (quantified in Fig. 6 C) and  
 132 vitreous chamber depth (VCD, quantified in Fig. 6 D) are increased in *Irbp* mutant mice  
 133 (*Irbp*<sup>-/-</sup>; *Mfrp*<sup>+/-</sup>) and reduced in *Mfrp* mutant and *Irbp*; *Mfrp* double mutant mice (*Irbp*<sup>+/-</sup>;  
 134 *Mfrp*<sup>-/-</sup> and *Irbp*<sup>-/-</sup>; *Mfrp*<sup>-/-</sup>, respectively) compared to control *Irbp*<sup>+/-</sup>; *Mfrp*<sup>+/-</sup> mice at P18. In  
 135 contrast, and retinal thickness **(D)** were reduced in *Irbp* mutant mice (*Irbp*<sup>-/-</sup>; *Mfrp*<sup>+/-</sup>) and  
 136 retinal thickness was increased in *Mfrp* mutant and *Irbp*; *Mfrp* double mutant mice (*Irbp*<sup>+/-</sup>;  
 137 *Mfrp*<sup>-/-</sup> and *Irbp*<sup>-/-</sup>; *Mfrp*<sup>-/-</sup>, respectively) compared to control *Irbp*<sup>+/-</sup>; *Mfrp*<sup>+/-</sup> mice. Data are  
 138 presented as mean ± SD, N<sub>≥</sub>8/group. \*\*p<0.01; \*\*\*p<0.0001 (compared to controls);  
 139 ###p<0.001 (compared to double mutant *Irbp*<sup>-/-</sup>; *Mfrp*<sup>-/-</sup> mice), One-way Anova.



140  
141

**Table S1. List of genotyping primers**

| Allele (mouse strain)                                                 | Primer name      | Primer sequence                                         |
|-----------------------------------------------------------------------|------------------|---------------------------------------------------------|
| <b><i>Prss56<sup>glcr4</sup></i></b><br>(C57BL/6.Cg-Prss56 glcr4/SjJ) | Prss56 glcr4 F1  | 5' TGGCTCCAGAAACCAAAGCCGGAA<br>GAGCGCCCGGAAACAAAGAGT 3' |
|                                                                       | Prss56 glcr4 F2  | 5' GCGGCGCCCGGAAACAAAGGA 3'                             |
|                                                                       | Prss56 glcr4 R   | 5' TCCTGGAAGAGAGGGGAGTGA 3'                             |
| <b><i>Prss56<sup>Cre</sup></i></b><br>(C57Bl/6.Cg-Prss56tm)           | Prss56 Cre F     | 5' CAG GGC ATC GTT TCC CTG AG 3'                        |
|                                                                       | Prss56 Cre R WT  | 5' GAC AGG CGC GTG TAC AGT GG 3'                        |
|                                                                       | Prss56 Cre R Cre | 5' CCA TGA GTG AAC GAA CCT GG 3'                        |
| <b><i>Egr1<sup>-/-</sup></i></b><br>(C57BL/6. Egr1tm1Jmi/J)           | EGR1 common R    | 5' GGG CAC AGG GGA TGG GAA3                             |
|                                                                       | EGR1 MUT F       | 5' AAC CGG CCC AGC AAG ACA 3'                           |
|                                                                       | EGR1 WT F        | 5' CTC GTG CTT TAC GGT ATC G 3'                         |
| <b><i>Adamts19<sup>-/-</sup></i></b><br>(Adamts19tm4a(EUCOMM)Wtsi)    | Adamts19_244_F   | 5' AGA AGG GAA CAA ACA CAA CAA GTG 3'                   |
|                                                                       | Adamts19_244_R   | 5' AGT TAG CCT GAG CCT GTG TGG 3'                       |
|                                                                       | CAS_R1_Term      | 5' TCG TGG TAT CGT TAT GCG GCC 3'                       |
| <b><i>Mfrp<sup>-/-</sup></i></b><br>( B6.C3Ga-Mfrprd6/J)              | Mfrp F           | 5' CAC TAC CAC CCC AGC AAG GAC 3'                       |
|                                                                       | Mfrp R           | 5' CTT CTC CAG AGA GTG CCC TTG 3'                       |
| <b><i>Irbp<sup>-/-</sup></i></b><br>(B6.129P2-Rbp3tm1Gil/J)           | Common IRBP      | 5' CAT ATC CAC ACC TGC CAA CA 3'                        |
|                                                                       | MF IRBP          | 5' GCT ACT TCC ATT TGT CAC GTC C 3'                     |
|                                                                       | WT IRBP          | 5' GGA CCC ACA CCT GAA GAC AG3'                         |
| <b><i>Ubc-Cre</i></b><br>(C57Bl/6.Cg-Tg(UBC-Cre/ERT2)1Ejb)            | Cr1              | 5' TGA TGA GGT TCG CAA GAA CC 3'                        |
|                                                                       | Cr2              | 5' CCA TGA GTG AAC GAA CCT GG 3'                        |

142  
143  
144  
145  
146  
147  
148  
149

**Table S2. List of qPCR primers**

| Gene                       | Forward Primer                 | Reverse Primer              |
|----------------------------|--------------------------------|-----------------------------|
| <b>House Keeping Genes</b> |                                |                             |
| <i>Actb</i>                | 5' CCCTGAGGAGCACCTGTGC 3'      | 5' GGCTGGGGTGTGAAGGTCT 3'   |
| <i>Hprt1</i>               | 5' TGCCGAGGATTTGAAAAAGTGT 3'   | 5' GTGATGGCCTCCCATCTCCT 3'  |
| <i>Mapk1</i>               | 5' TTGAACAGGCTCTGGCCAC 3'      | 5' TGAATGGCGCTTCAGCAATGG 3' |
| <b>Genes of Interest</b>   |                                |                             |
| <i>Prss56</i>              | 5' ACCTGGACGCCCTAGACCTC 3'     | 5' TGTTGGCAACGCCTTGATGT 3'  |
| <i>Adamts19</i>            | 5' TGCTGAAGACAACGGCCTGA 3'     | 5' CAGCACAGGATGGGTGGTCA 3'  |
| <b>Adamts19 Ex3</b>        | 5' GAGGACTTCTATTCAATTGAGCCA 3' | 5' CCTGTATAAACGGTGCGGGT 3'  |

150  
151  
152
